# Supplementary material for: Metabolic Biomarkers for Prognostic Prediction of Pre-diabetes: results from a longitudinal cohort study
Source: PubMed Central journal article supplement (PMC5529507; doi:10.1038/s41598-017-06309-6), 2017-07-26
Supplement: 41598_2017_6309_MOESM1_ESM.pdf [file 41598_2017_6309_MOESM1_ESM.pdf]

## Supplementary information

### **Metabolic Biomarkers for Prognostic Prediction of Pre-diabetic Patients: results from a longitudinal cohort study**

Hailuan Zeng<sup>1</sup>, Renchao Tong<sup>1</sup>, Wenxin Tong<sup>1</sup>, Qiaoling Yang<sup>1,2</sup>, Miaoyan Qiu<sup>1</sup>, Aizhen Xiong<sup>1</sup>, Siming Sun<sup>2</sup>, Lili Ding<sup>1,2</sup>, Hongli Zhang<sup>1,2</sup>, Li Yang<sup>1,\*</sup>, Jingyan Tian<sup>1,2,\*</sup>

<sup>1</sup>Department of Endocrinology and Metabolism, Shanghai Institute of Endocrine and Metabolic Diseases, Ruijin Hospital, Shanghai Jiao Tong University School of Medicine, Shanghai, China; The MOE Key Laboratory for Standardization of Chinese Medicines, Center for Chinese Medical Therapy and Systems Biology, Shanghai University of Traditional Chinese Medicine, Shanghai, China

<sup>2</sup>Department of Diabetes Complications & Metabolism, Beckman Research Institute, City of Hope, 1500 East Duarte Road, Duarte, CA

Hailuan Zeng and Renchao Tong contributed equally to this work. Correspondence and requests for materials should be addressed to J. T. (tianjypaper@163.com) or Y. L. (yl7@shutcm.edu.cn).

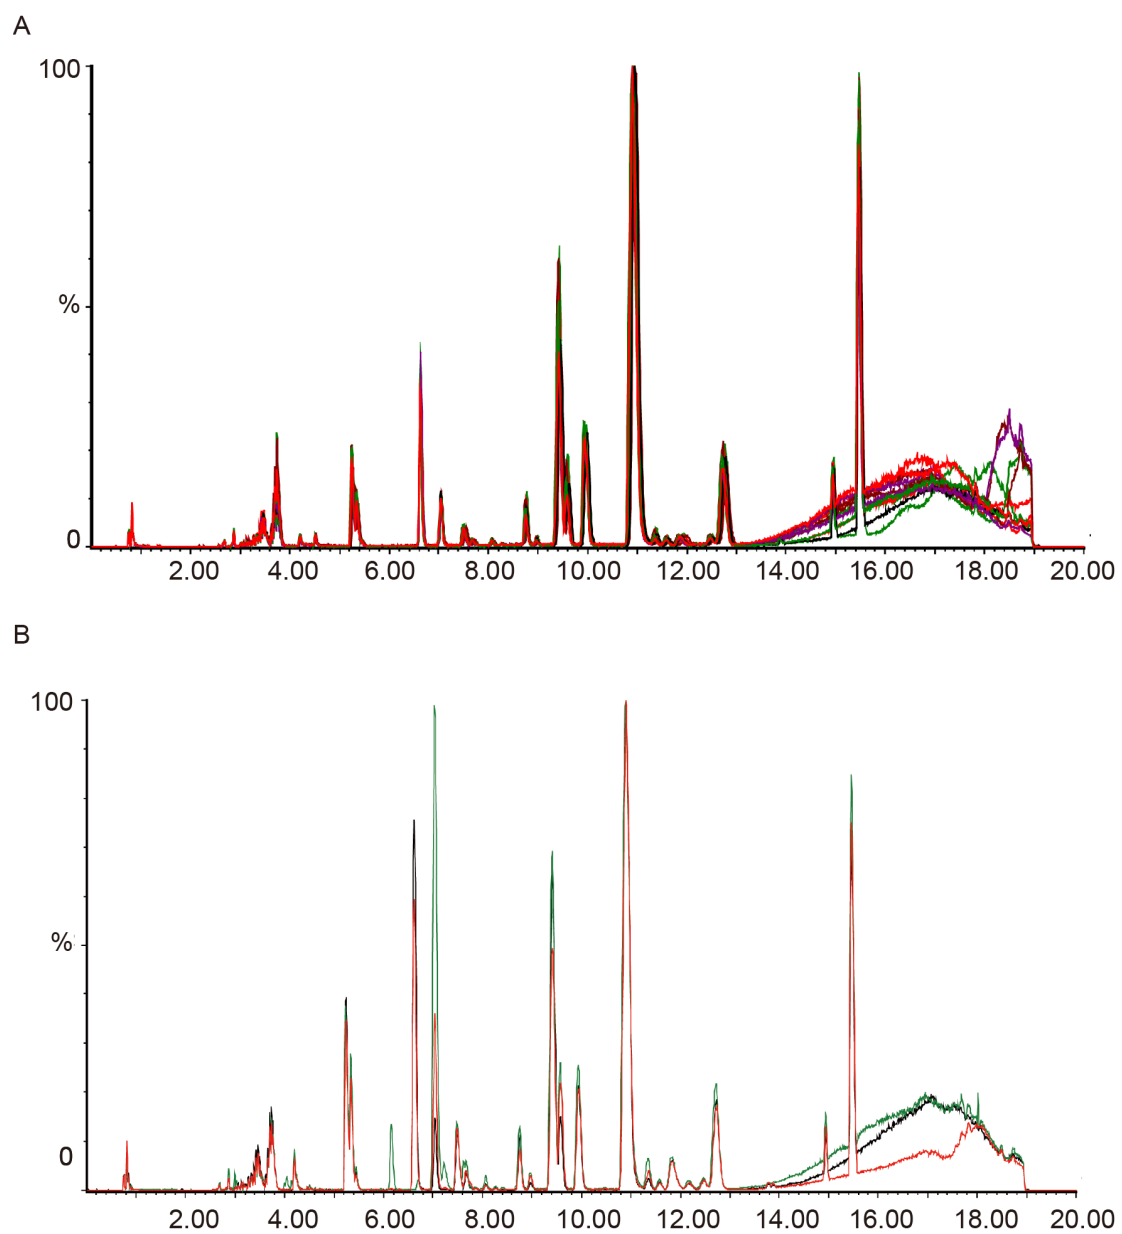

Fig. S1. A. Total ion current chromatograms of the QC samples. B. Typical UPLC-QTOF/MS base peak intensity (BPI) chromatograms for 1 NGR, 1 pre-DM and 1 DM sample in the positive mode. The Y axis shows relative abundance (%), and the X axis shows retention time in minutes, which was used to identify individual metabolites.

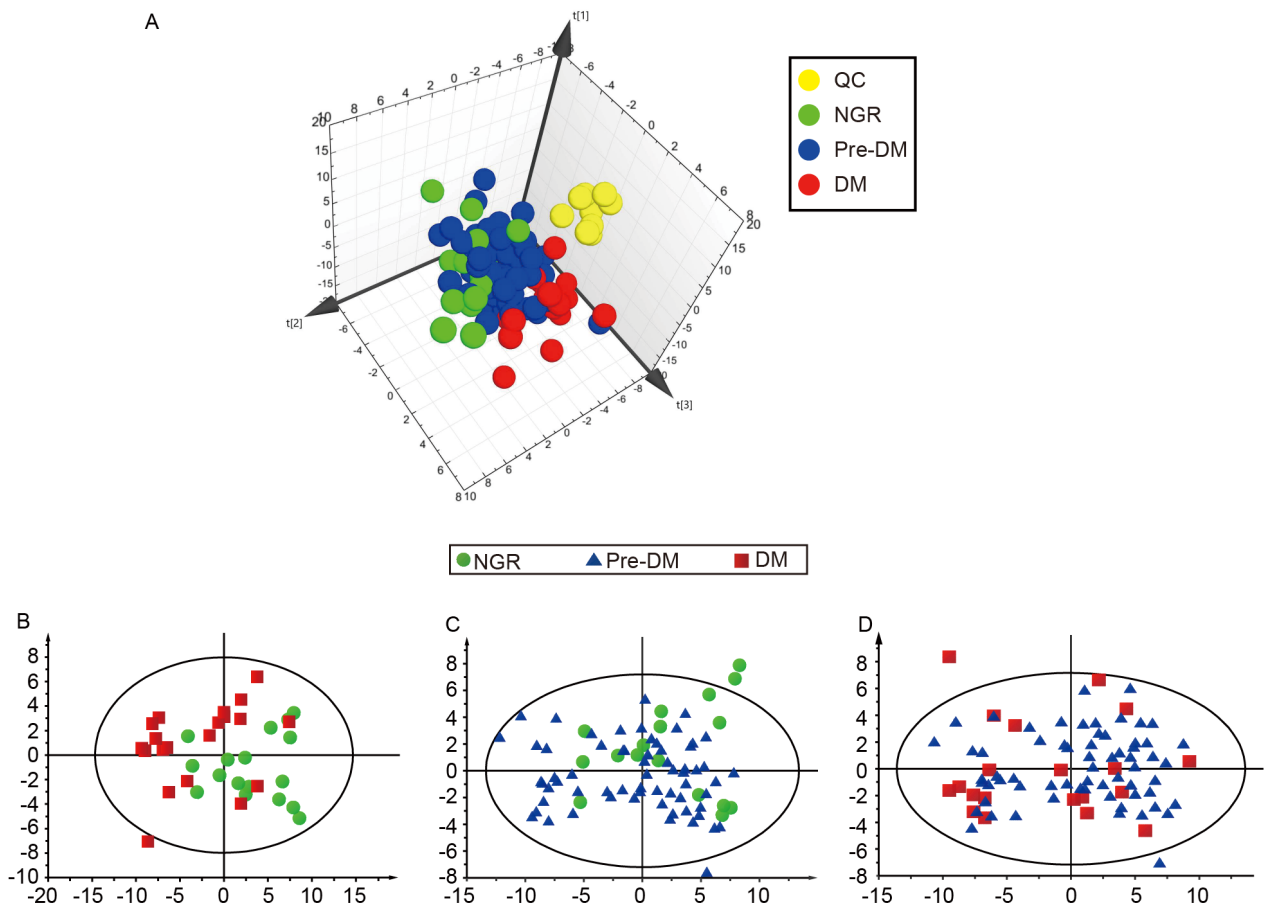

Fig. S2. PCA score plots of different groups based on plasma spectral data of UPLC-QTOF-MS positive ion mode. One point stands for one subject. A. PCA score plot of the NGR vs pre-DM vs DM groups and QC samples. B. PCA score plot of the the NGR vs DM. C. PCA score plot of the the NGR vs pre-DM. D. PCA score plot of the the pre-DM vs DM.

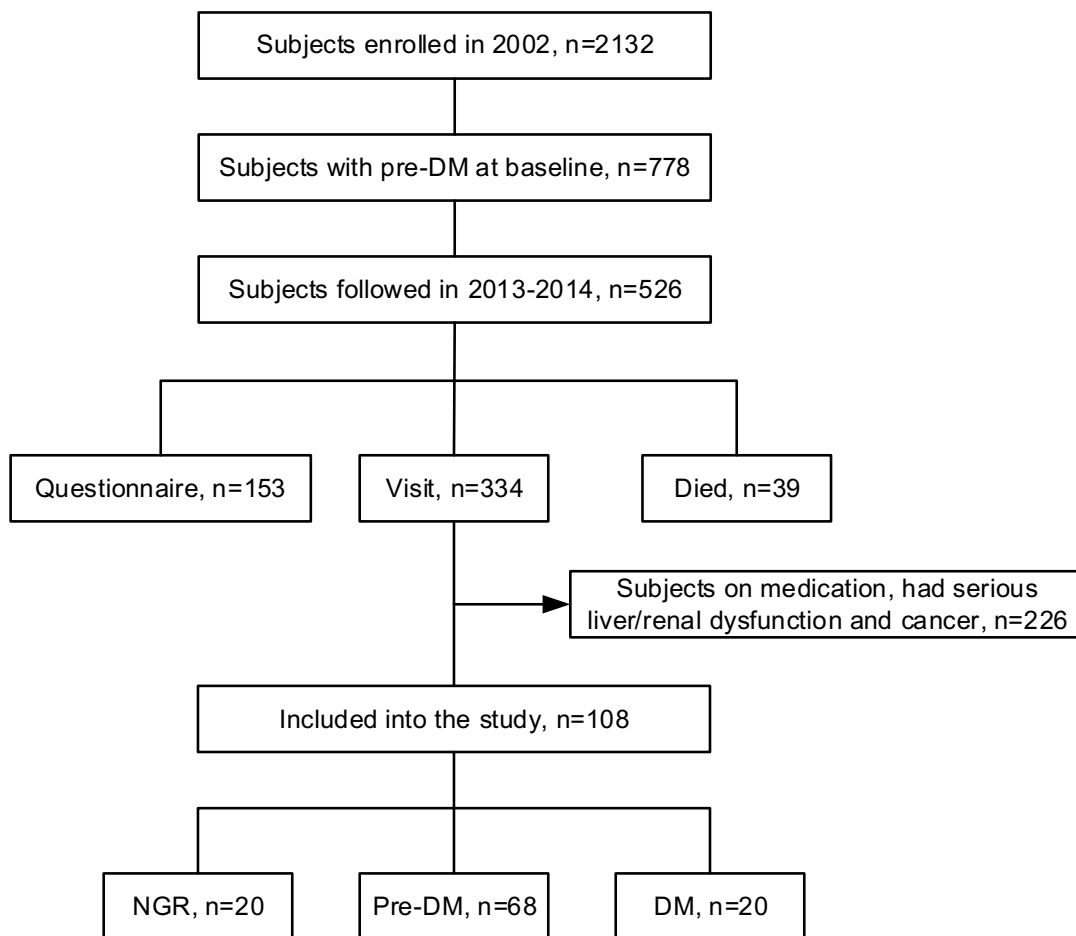

Fig. S3. Details on the study population.

|                                    | <b>NGR(n=20)</b> | <b>Pre-DM(n=68)</b> | <b>DM(n=20)</b> |
|------------------------------------|------------------|---------------------|-----------------|
| Body mass index, kg/m <sup>2</sup> | 25.7±2.8         | 25.6±2.7            | 26.1±3.5        |
| Waist circumference, cm            | 80.9±8.5         | 82.3±7.1            | 84.0±10.8       |
| Waist-hip ratio                    | 0.84±0.05        | 0.84±0.05           | 0.86±0.06       |
| Hypertension, %                    | 55.0             | 54.4                | 70.0            |
| SBP, mmHg                          | 134.8±16.9       | 134.5±16.6          | 135.3±22.7      |
| DBP, mmHg                          | 84.3±9.5         | 84.0±12.1           | 83.0±11.7       |
| Fasting glucose, mmol/L            | 5.9±0.3          | 5.9±0.4             | 6.1±0.3         |
| 2-h glucose, mmol/L                | 5.7±0.8          | 5.9±1.3             | 6.0±1.5         |
| HDL, mmol/L                        | 1.4±0.3          | 1.4±0.3             | 1.5±0.4         |
| LDL, mmol/L                        | 3.0±0.8          | 2.9±0.7             | 3.1±0.9         |
| TC, mmol/L                         | 5.1±0.9          | 5.1±0.9             | 5.1±1.2         |
| TG, mmol/L                         | 1.4±0.8          | 1.7±1.1             | 1.8±1.1         |

**Table S1. Characteristics of the study participants at baseline.** Values are mean ± SD or %. Abbreviations are the same as Table 1.

| Metabolites                      | AUC   | Significance | 95% CI |       | CV% in QC samples |
|----------------------------------|-------|--------------|--------|-------|-------------------|
|                                  |       |              | Lower  | Upper |                   |
| 20-Hydroxy-leukotriene E4        | 0.749 | 0.001        | 0.637  | 0.862 | 13.9              |
| Delta 8,14 -Sterol               | 0.640 | 0.063        | 0.489  | 0.791 | 14.8              |
| Pantetheine                      | 0.743 | 0.001        | 0.606  | 0.879 | 18.5              |
| Caprylic acid                    | 0.670 | 0.024        | 0.538  | 0.802 | 10.6              |
| N(6)-(octanoyl)lysine            | 0.665 | 0.028        | 0.515  | 0.816 | 11.3              |
| Lysyl-Tyrosine                   | 0.642 | 0.060        | 0.490  | 0.793 | 8.7               |
| Pc(18:3/20:3)                    | 0.639 | 0.065        | 0.487  | 0.792 | 14.8              |
| LysoPE(20:5/0:0)                 | 0.651 | 0.045        | 0.494  | 0.808 | 13.7              |
| Lysopc(20:4)                     | 0.429 | 0.349        | 0.262  | 0.597 | 14.2              |
| 2,3-Epoxymenaquinone             | 0.764 | <0.001       | 0.654  | 0.873 | 11.1              |
| Lysopc(18:3)                     | 0.332 | 0.026        | 0.204  | 0.460 | 10.9              |
| cis-13,16-Docosadienoic acid     | 0.724 | 0.003        | 0.582  | 0.866 | 11.0              |
| S-(hydroxymethyl)glutathione     | 0.716 | 0.004        | 0.579  | 0.854 | 12.8              |
| 3-Phenylbutyric acid             | 0.661 | 0.033        | 0.509  | 0.813 | 12.6              |
| 1-Stearoylglycerophosphoglycerol | 0.725 | 0.003        | 0.595  | 0.855 | 12.4              |
| 5-methoxytryptamine              | 0.717 | 0.004        | 0.575  | 0.858 | 10.6              |
| Lysopc(20:5)                     | 0.366 | 0.075        | 0.241  | 0.490 | 13.1              |
| Endomorphin-1                    | 0.727 | 0.003        | 0.596  | 0.859 | 11.8              |
| L-palmitoylcarnitine             | 0.715 | 0.004        | 0.584  | 0.837 | 7.9               |
| N6-Acetyl-L-lysine               | 0.644 | 0.056        | 0.491  | 0.798 | 4.1               |
| Pc(14:1/16:1)                    | 0.683 | 0.015        | 0.564  | 0.803 | 9.4               |
| LysoPC(20:3)                     | 0.381 | 0.115        | 0.253  | 0.509 | 9.1               |
| 3-Ethylphenol                    | 0.699 | 0.008        | 0.571  | 0.827 | 6.8               |

Table S2. AUC of single biomarkers identified for transition to NGR, significance of ROC analysis, 95% CI and CV% values in QC samples.

| Metabolites                                                     | AUC   | Significance | 95% CI |       | CV% in QC samples |
|-----------------------------------------------------------------|-------|--------------|--------|-------|-------------------|
|                                                                 |       |              | Lower  | Upper |                   |
| 2-ketobutyric acid                                              | 0.234 | <0.001       | 0.107  | 0.362 | 14.6              |
| Iso-valeraldehyde                                               | 0.183 | <0.001       | 0.076  | 0.289 | 9.9               |
| Betaine                                                         | 0.246 | 0.001        | 0.118  | 0.373 | 13.3              |
| Pantetheine                                                     | 0.343 | 0.033        | 0.199  | 0.486 | 14.2              |
| Uric acid                                                       | 0.331 | 0.022        | 0.214  | 0.447 | 15.2              |
| L-carnitine                                                     | 0.243 | 0.001        | 0.117  | 0.368 | 13.6              |
| L-threonine                                                     | 0.204 | <0.001       | 0.081  | 0.328 | 14.8              |
| Lysopc(16:0/0:0)                                                | 0.348 | <0.040       | 0.224  | 0.472 | 10.0              |
| Linoleic acid                                                   | 0.671 | 0.021        | 0.536  | 0.806 | 7.7               |
| Lysopc(18:1)                                                    | 0.325 | 0.018        | 0.193  | 0.457 | 10.3              |
| 3-dehydroxycarnitine                                            | 0.703 | 0.006        | 0.575  | 0.832 | 5.7               |
| Palmitic amide                                                  | 0.367 | 0.073        | 0.234  | 0.500 | 10.9              |
| 3,5-dihydroxybenzoic acid                                       | 0.256 | 0.001        | 0.125  | 0.388 | 12.7              |
| L-lysine                                                        | 0.276 | 0.002        | 0.167  | 0.385 | 12.8              |
| 2-Pyrroloylglycine                                              | 0.292 | 0.005        | 0.160  | 0.424 | 10.0              |
| Kynuramine                                                      | 0.784 | <0.001       | 0.661  | 0.908 | 16.1              |
| Dityrosine                                                      | 0.687 | 0.012        | 0.551  | 0.822 | 13.2              |
| 5-hydroxy-2-oxo-4-ureido-2,5-dihydro-1h-imidazole-5-carboxylate | 0.225 | <0.001       | 0.107  | 0.343 | 11.8              |
| Lysopc(18:0)                                                    | 0.376 | 0.094        | 0.238  | 0.514 | 13.3              |
| Pc(18:0/18:2)                                                   | 0.432 | 0.356        | 0.298  | 0.566 | 18.1              |
| 1,3,7-trimethyluric acid                                        | 0.699 | 0.007        | 0.579  | 0.820 | 11.4              |
| Pc(16:0/14:0)                                                   | 0.347 | 0.039        | 0.211  | 0.483 | 18.6              |

Table S3. AUC of single biomarkers identified for transition to DM, significance of ROC analysis, 95% CI and CV% in QC samples.
